# Supplementary material for: Insulin-like growth factor 1 reduces coronary atherosclerosis in pigs with familial hypercholesterolemia
Source: PubMed Central journal article supplement (PMC9990768; doi:10.1172/jci.insight.165713), 2023-02-22
Supplement: jciinsight-8-165713-s011.pdf [file jciinsight-8-165713-s011.pdf]

## **Extended methods**

***Intravascular ultrasound (IVUS).*** We used 14-month-old FH non-castrated males (N=5/group) and gilt (never been used for breeding) females (N=9/group) and administered recombinant human IGF-1 (rhIGF-1), 50 ug/kg/day, twice per day, or saline for 6 months. Intravascular ultrasound (IVUS) was performed in the RCA and LAD at basal level and after 3 months and 6 months of injections. We assigned 2 pigs per IVUS procedure/day: one pig from the IGF-1 group and one from the saline group. Pigs were pre-treated with a daily dose of aspirin (325 mg) for 3 days before IVUS. All animals were fasted for 12 hours prior to IVUS procedure. Telazol (2.25-6 mg/kg IM) and xylazine (1-2.25 mg/kg IM) were administered for anesthesia. An intravenous catheter was placed in a marginal ear vein for the administration of fluids and drugs. The auricular artery was cannulated to allow for arterial blood pressure measurements and baseline blood pressure. Diazepam (0.5-1.0 mg/kg IV) was given to aid with intubation. An appropriately sized endotracheal tube was inserted for mechanical ventilation. Pigs were intubated and ventilated with oxygen mixed with nitrogen (compressed medical air). Ventilation parameters were set to maintain inspiratory pressures between 15–30 mmHg, respiration rate of 10–20 BPM and  $spO_2$  92–100%. Arterial blood gases were taken and if  $pO_2$ ,  $CO_2$  and pH were out of the reference range, ventilation parameters were adjusted to correct. General anesthesia was maintained with isoflurane (1.5 to 3%) in  $O_2$ . Blood oxygenation was monitored using continuous pulse oximetry. Electrocardiogram was monitored throughout the entire procedure to detect myocardial infarction and possible arrhythmias requiring medical intervention. The pig was placed on a heating blanket to maintain rectal temperature at 36.5 to 39.0°C (assessed via rectal probe). Artificial tears ophthalmic ointment was applied bilaterally to the corneal surfaces to keep the corneas moist during the procedure. After intubation and clipping the vascular access area, a sterile prep was performed using 3 cycles of surgical scrub betadine or chlorohexidine. The right or left femoral artery and vein were cannulated with a percutaneous sheath for catheter advancement into the coronary arteries. To prevent thrombosis throughout the duration of the procedure, a loading dose of heparin was administered as needed to achieve an activated clotting time >300 seconds. Contrast-enhanced coronary cine angiographic images were acquired and stored using the Innova Optima CL323i X-ray

system (GE Healthcare, Pewaukee, WI). Intravascular ultrasound was performed using the IVUS imaging system (Volcano Corporation, San Diego, CA) and a 20 MHz 3.5 F Visions PV 0.035 Digital IVUS Catheter (Volcano Corporation, San Diego, CA) advanced to the left anterior descending artery (LAD) and the right coronary artery (RCA) through a standard 5 F guide catheter. Operative management included fluid maintenance (0.9% saline) and the administration of long-acting cefazolin sodium (15 mg/kg, IM) as antibiotic prophylaxis. After the procedure, the catheters were removed, and the artery closed (Angio-Seal Vascular Closure Device, Terumo Medical Corp, New Jersey, NJ). Analgesia was provided with Buprenex-SR (0.12-0.27 mg/kg SC). Following the final invasive imaging procedure, pigs were euthanized while under deep isoflurane anesthesia using potassium chloride (KCl, 20 mEq IV) to arrest the heart in diastole.

To inject solutions, we used a Stratis needle-free injection system (PharmaJet, Golden, CO). All pigs received a high-fat diet (HFD) starting the day after the T0 IVUS. The HFD contains 800 g/day (by weight 13% protein, 39.6% carbohydrate, 47.4% fat and 2% cholesterol)(1). Pigs have free access to water. Body weight was measured weekly.

***IVUS analysis.*** Coronary arteries contain the tunica intima layer (a complex of endothelium, atheroma, and internal elastic membrane (IEM)), tunica media layer (TM) (TM consists of smooth muscle and external elastic membrane (EEM)) and tunica externa layer which comprises the tunica adventitia (TA) and peri-adventitial tissues(2). Since the leading edge of the media (corresponding to the IEM) is not well delineated, IVUS measurements cannot determine true histological atheroma area. Consistent with the 2021 clinical expert consensus document on IVUS measurements the EEM and lumen areas are used to calculate a surrogate for true atherosclerotic plaque area and the term “plaque plus media area” is recommended(2). For the current study 20 mm of IVUS pullback segment distal to the ostia of the right coronary artery (RCA) and the left anterior descending artery (LAD) were selected. The area circumscribed by the outer border of the echolucent TM and the luminal border was manually traced on each 1 mm IVUS frame within selected fragment. SS and ZR independently performed the manual outline of both areas, and ZR was blinded to the individual animal assignment. The inter-rater variability

was 10.5%, 7.2% and 10.8% for evaluation of lumen volume, vessel volume and relative atheroma volume, respectively.

***Atherosclerotic burden assessment by histology.*** Following completion of the experimental protocol, hearts were excised in accordance with the recommendation of the American Veterinary Medical Association Guide on Euthanasia (2020 Edition). The entire right coronary (RCA) and the left anterior descending (LAD) arteries were collected, and the proximal 30 mm fragment of RCA and LAD was immersed into 10% formalin, and further cut onto 6x5 mm fragments. One Trichrome-stained section per each block was used to quantify atherosclerotic burden. Sections were imaged with Olympus IX71 inverted microscope equipped with DP80 camera. Analysis of vessel morphometry was performed with CellSens Dimension 1.18 software (Olympus) by two independent researchers, one of them blinded. The mean $\pm$ SEM discrepancy between evaluators was 11.2 $\pm$ 1.7%. EEM, IEM and luminal border were manually outlined, and corresponding cross-sectional areas (CSA) were measured.

The following indices were assessed:

- 1) relative tunica media CSA =  $(\text{EEM}-\text{IEM})/\text{EEM} \times 100\%$ .
- 2) relative atherosclerotic plaque CSA =  $(\text{IEM}-\text{Luminal area})/\text{EEM} \times 100\%$ .
- 3) necrotic core (NC) area and fibrous cap (FC) area were manually outlined using CellSens Dimension software. The NC was defined as acellular (hematoxylin-negative) plaque area.
- 4) FC was defined as largely uninterrupted strip of brown-colored (smooth muscle, connective tissues) material on the top of necrotic or lipid core with a higher density of nuclei than the plaque core. The thickness of FC was calculated as the mean length of 5 arbitrary lines distributed across the cap area.

***Plaque composition analysis.*** The cellular content of coronary plaques was assessed by immunohistochemistry (IHC). To perform IHC coronary sections were deparaffinized, dehydrated and processed with heat-mediated antigen retrieval using citrate buffer (pH 6.0) followed by blocking step (Protein block, Abcam, ab64226). Sections were incubated overnight at +4°C with mixture of primary antibodies, or with mixture of normal IgG (negative control). The 1<sup>st</sup> section was incubated with mouse  $\alpha$ -SMA antibody (Millipore,

CBL171, clone ASM1) plus rabbit pH2A.X histone antibody (Cell Signaling, 9718, clone 20E3). The 2<sup>nd</sup> serial section was incubated with mouse SRA antibody (TransGenia Inc., KT022, clone SRA-E5) plus rabbit CD31 antibody (Abcam, 134168, clone EP3095) and the 3<sup>rd</sup> serial section with mouse IgG plus rabbit IgG (both are from Santa Cruz Biotechnology, sc-2025 and sc-2027, respectively). Rabbit antibody signal was visualized with goat anti-rabbit-biotin IgG (Abcam, BA-1000) followed by incubation with streptavidin-AlexaFluor594 conjugate (Life Technologies, S32356) plus DAPI. Mouse antibody signal was amplified with Alexa Fluor 488 Tyramide Super Boost kit (Invitrogen, B40912). Sections were mounted with ProLong Gold antifade media (Thermo Fisher, P36970) for imaging. To quantify immunopositivity for each antibody, sections were scanned with Cytation 5 multi-mode imager (Bio-Tek, Winooski, MI) using standard Texas Red, GFP and DAPI filter cubes to generate greyscale images for each channel. Next, vessel morphological regions-of-interest (ROI) (i.e., TM, plaque, etc.) were manually outlined and area positive for cellular marker was quantified within ROI. The ratio of marker-positive area per ROI area (x 100%) was calculated and shown in Figures.

**Cell apoptosis.** To quantify cell apoptosis, we used *In Situ* Cell Death Detection Kit, TMR red (Millipore, 12156792910) as per manufacturer's instructions. Briefly, sections were deparaffinized, dehydrated and permeabilized with Digest-All 2 (Trypsin) kit (Invitrogen, OO3008). Next, sections were incubated with TUNEL mixture diluted 1:2 with TUNEL dilution buffer (Roche, 11966006001) for 45 min at 37°C, washed with PBS, co-stained with DAPI and mounted with ProLong Gold antifade media. Treatment with DNase I (Ambion, AM2222, 10U/sections) for 20 min at 37°C was used to generate positive control. Each slide with TUNEL-stained section contained a serial section stained with dUTP-omitted TUNEL mixture serving as a negative control. Total cell apoptosis was defined as TUNEL-positive cell number per 1000 DAPI-positive nuclei.

**Monocyte subsets.** To count circulating CD163<sup>lo</sup>/CD14<sup>hi</sup> monocytes, whole blood was mixed with a cocktail of monoclonal antibodies against CD163-PE (1: 80 dilution, Bio-Rad, MCA2311PE), and CD14-Alexa Fluor 488 (1: 20 dilution, Bio-Rad, MCA1568A488), porcine CD172a (1: 100 dilution, Southern Biotech, 4525-08), or appropriate isotype controls and subsequently with streptavidin-APC/Cy7 (1: 1000 dilution, Southern Biotech,

7105-19). Red blood cells were lysed by BD Pharm Lyse lysing solution (BD Biosciences, 555899) and washed 3 times using PBS before flow-cytometric analysis. Data acquisition and analysis were performed using Beckman Coulter Epics Gallios analyzer running Gallios software v1.1; CD172a-positive leukocytes were further size-gated to identify monocytes. The monocyte-gate was differentiated into two subsets based on CD163 and CD14 expression levels and counted as CD163<sup>lo</sup>/CD14<sup>hi</sup> monocytes and CD163<sup>hi</sup>/CD14<sup>lo</sup> monocytes(3).

***Spatial transcriptomics (ST)***. ST was conducted using the Visium Spatial Gene Expression System (10x Genomics, Pleasanton, CA). The RCA fragments were snap-frozen, embedded with OCT compound and cut at  $-26^{\circ}\text{C}$  at a thickness of 10  $\mu\text{m}$ . Optimization and gene expression assays were carried out according to the manufacturer's protocol. Briefly, slides were fixed in  $-20^{\circ}\text{C}$  methanol, dried with isopropanol, and stained with H&E. A tile scan image of the entire section was generated using a Cytation 5 imager. For tissue optimization, enzymatic permeabilization was conducted for 0–40 min, followed by first-strand cDNA synthesis with fluorescent nucleotides. The slide was reimaged using standard RFP filter cube. An optimal permeabilization time of 12 min was determined by visual inspection to maximize mRNA recovery while at the same time minimizing diffusion. Library preparation, clean-up, and indexing were conducted using company manual-guided procedures. Samples were subjected to pair-ended sequencing using an Illumina NextSeq 2000 generating ~800 M reads. Pig reference genome was created from *Sus scrofa* genomic sequence (Sscrofa 11.1) and Ensembl annotation, and reads were aligned and counted by Space Ranger (10x Genomics). All the downstream analyses were performed using R toolkit Seurat(4) and Ingenuity pathway analysis (IPA) software (Qiagen). SMC-, MF- and fibromyocytes (FM) distribution and calculation of cell type ratio were predicted by mixed cell deconvolution analysis driven by Seurat using human atherosclerotic RCA single cell RNA seq dataset (accession number GSE131778)(5).

## References

1. Masseau I, and Bowles DK. Carotid Endothelial VCAM-1 Is an Early Marker of Carotid Atherosclerosis and Predicts Coronary Artery Disease in Swine. *J Biomed Sci Eng.* 2015;8(11):789-96.

2. Saito Y, Kobayashi Y, Fujii K, Sonoda S, Tsujita K, Hibi K, et al. Clinical expert consensus document on intravascular ultrasound from the Japanese Association of Cardiovascular Intervention and Therapeutics (2021). *Cardiovasc Interv Ther.* 2022;37(1):40-51.
3. Gordon S, and Taylor PR. Monocyte and macrophage heterogeneity. *Nat Rev Immunol.* 2005;5(12):953-64.
4. Butler A, Hoffman P, Smibert P, Papalexi E, and Satija R. Integrating single-cell transcriptomic data across different conditions, technologies, and species. *Nat Biotechnol.* 2018;36(5):411-20.
5. Wirka RC, Wagh D, Paik DT, Pjanic M, Nguyen T, Miller CL, et al. Atheroprotective roles of smooth muscle cell phenotypic modulation and the TCF21 disease gene as revealed by single-cell analysis. *Nat Med.* 2019;25(8):1280-9.

**Supplemental Table 1. FH pigs blood pressure (BP) and heart rate (HR)**

| Time-point/drug | Sex | BP, mmHg, systolic |      | BP, mmHg, diastolic |     | HR, bpm |      |
|-----------------|-----|--------------------|------|---------------------|-----|---------|------|
|                 |     | Mean               | SEM  | Mean                | SEM | Mean    | SEM  |
| T0              | M   | 109                | 5.3  | 83.6                | 6.7 | 93.6    | 7.8  |
|                 | F   | 114.5              | 6.6  | 76.3                | 4.5 | 102.7   | 5.8  |
| T3/Saline       | M   | 118.0              | 6.6  | 91.0                | 3.8 | 104.3   | 7.3  |
|                 | F   | 130.7              | 14.5 | 87.2                | 8.0 | 94.0    | 12.9 |
| T3/IGF-1        | M   | 129.3              | 4.5  | 85.5                | 4.5 | 102.2   | 4.4  |
|                 | F   | 121.8              | 7.6  | 81.0                | 4.0 | 104.7   | 9.8  |
| T6/Saline       | M   | 127.0              | 9.1  | 84.0                | 7.5 | 100.5   | 8.6  |
|                 | F   | 133.7              | 3.7  | 91.8                | 8.6 | 89.0    | 3.9  |
| T6/IGF-1        | M   | 120.2              | 7.8  | 72.0                | 7.1 | 99.3    | 6.1  |
|                 | F   | 116.5              | 7.3  | 68.8                | 4.8 | 100.2   | 6.7  |

**Supplemental Table 2A. FH pigs blood biochemistry (males).**

| Male            | Units | Group  | 0    |      | 1-mo |      | 2-mo |      | 3-mo |     | 4-mo |     | 5-mo |     | 6-mo |      |
|-----------------|-------|--------|------|------|------|------|------|------|------|-----|------|-----|------|-----|------|------|
|                 |       |        | Avg  | SD   | Avg  | SD   | Avg  | SD   | Avg  | SD  | Avg  | SD  | Avg  | SD  | Avg  | SD   |
| Total Protein   | g/dL  | Saline | 6.5  | 0.4  | 6.7  | 0.3  | 6.3  | 0.4  | 5.8  | 0.3 | 6.2  | 0.3 | 6.4  | 0.4 | 6.5  | 0.4  |
|                 |       | IGF-1  | 6.4  | 0.3  | 6.4  | 0.1  | 6.0  | 0.3  | 5.9  | 0.3 | 6.1  | 0.4 | 6.3  | 0.3 | 6.2  | 0.4  |
| Albumin         | g/dL  | Saline | 4.1  | 0.1  | 4.2  | 0.1  | 4.1  | 0.2  | 3.9  | 0.2 | 4.1  | 0.3 | 4.0  | 0.5 | 4.0  | 0.4  |
|                 |       | IGF-1  | 4.0  | 0.2  | 3.8  | 0.1  | 3.5  | 0.1  | 3.5  | 0.1 | 3.7  | 0.2 | 3.9  | 0.2 | 3.7  | 0.2  |
| Globulin        | g/dL  | Saline | 2.4  | 0.4  | 2.5  | 0.3  | 2.2  | 0.5  | 1.9  | 0.4 | 2.1  | 0.3 | 2.3  | 0.6 | 2.5  | 0.7  |
|                 |       | IGF-1  | 2.4  | 0.3  | 2.6  | 0.2  | 2.4  | 0.3  | 2.4  | 0.3 | 2.4  | 0.3 | 2.5  | 0.3 | 2.5  | 0.3  |
| A/G Ratio       |       | Saline | 1.8  | 0.4  | 1.7  | 0.2  | 2.0  | 0.4  | 2.1  | 0.5 | 2.0  | 0.4 | 1.9  | 0.7 | 1.7  | 0.6  |
|                 |       | IGF-1  | 1.7  | 0.3  | 1.5  | 0.2  | 1.5  | 0.2  | 1.5  | 0.2 | 1.6  | 0.3 | 1.6  | 0.3 | 1.5  | 0.3  |
| AST (SGOT)      | IU/L  | Saline | 24   | 2.9  | 39   | 17.0 | 50   | 64.6 | 22   | 3.3 | 24   | 3.8 | 26   | 9.4 | 20   | 2.5  |
|                 |       | IGF-1  | 30   | 12.4 | 25   | 4.3  | 24   | 6.1  | 23   | 6.6 | 22   | 6.0 | 21   | 3.1 | 28   | 18.4 |
| ALT (SGPT)      | IU/L  | Saline | 28   | 0.8  | 29   | 3.0  | 28   | 5.5  | 23   | 2.4 | 22   | 2.4 | 20   | 3.3 | 21   | 2.3  |
|                 |       | IGF-1  | 33   | 6.6  | 32   | 2.8  | 27   | 2.9  | 24   | 2.0 | 23   | 1.6 | 21   | 2.3 | 27   | 9.8  |
| Alk Phosphatase | IU/L  | Saline | 78   | 30   | 96   | 39   | 95   | 44   | 81   | 38  | 93   | 38  | 75   | 28  | 83   | 41   |
|                 |       | IGF-1  | 80   | 22   | 107  | 23   | 90   | 17   | 79   | 21  | 80   | 22  | 84   | 23  | 82   | 37   |
| GGT             | IU/L  | Saline | 28   | 9    | 32   | 10   | 28   | 9    | 28   | 9   | 32   | 10  | 34   | 8   | 31   | 8    |
|                 |       | IGF-1  | 34   | 9    | 37   | 8    | 34   | 7    | 32   | 7   | 33   | 5   | 37   | 7   | 38   | 5    |
| Total Bilirubin | mg/dL | Saline | 0.1  | 0.0  | 0.2  | 0.0  | 0.1  | 0.0  | 0.2  | 0.1 | 0.1  | 0.0 | 0.1  | 0.0 | 0.1  | 0.0  |
|                 |       | IGF-1  | 0.1  | 0.0  | 0.1  | 0.1  | 0.1  | 0.0  | 0.2  | 0.0 | 0.1  | 0.1 | 0.1  | 0.0 | 0.1  | 0.0  |
| BUN             | mg/dL | Saline | 10   | 1.8  | 9    | 1.6  | 10   | 0.8  | 9    | 2.2 | 9    | 1.5 | 12   | 2.6 | 13   | 1.8  |
|                 |       | IGF-1  | 9    | 1.3  | 8    | 1.8  | 8    | 2.0  | 8    | 1.7 | 7    | 1.5 | 9    | 1.9 | 12   | 1.8  |
| Creatinine      | mg/dL | Saline | 1.5  | 0.1  | 1.5  | 0.1  | 1.6  | 0.2  | 1.6  | 0.1 | 1.4  | 0.2 | 1.5  | 0.1 | 1.5  | 0.2  |
|                 |       | IGF-1  | 1.4  | 0.1  | 1.4  | 0.2  | 1.5  | 0.1  | 1.4  | 0.2 | 1.3  | 0.1 | 1.4  | 0.1 | 1.4  | 0.2  |
| BUN/CREAT RATIO |       | Saline | 7    | 1.3  | 6    | 0.9  | 6    | 0.0  | 6    | 0.9 | 7    | 1.3 | 8    | 1.6 | 8    | 1.6  |
|                 |       | IGF-1  | 7    | 1.5  | 6    | 1.1  | 5    | 1.7  | 6    | 1.8 | 6    | 1.3 | 6    | 1.2 | 9    | 0.5  |
| Phosphorus      | mg/dL | Saline | 6.9  | 0.7  | 6.1  | 0.5  | 6.5  | 0.5  | 5.6  | 0.3 | 5.5  | 0.1 | 5.7  | 0.3 | 6.0  | 0.5  |
|                 |       | IGF-1  | 7.4  | 0.9  | 6.5  | 0.8  | 5.7  | 0.8  | 6.2  | 0.8 | 5.8  | 0.7 | 6.3  | 0.4 | 6.3  | 0.6  |
| Glucose         | mg/dL | Saline | 156  | 80   | 79   | 12   | 87   | 9    | 180  | 41  | 92   | 7   | 100  | 16  | 132  | 39   |
|                 |       | IGF-1  | 90   | 16   | 83   | 7    | 117  | 23   | 108  | 44  | 90   | 9   | 116  | 45  | 133  | 11   |
| CALCIUM         | mg/dL | Saline | 10.7 | 0.5  | 10.8 | 0.2  | 10.7 | 0.2  | 10.6 | 0.2 | 10.6 | 0.3 | 10.5 | 0.5 | 10.7 | 0.2  |
|                 |       | IGF-1  | 10.6 | 0.5  | 10.5 | 0.2  | 10.2 | 0.1  | 10.3 | 0.5 | 10.3 | 0.1 | 10.3 | 0.3 | 10.2 | 0.3  |



**Supplemental Table 2B. FH pigs blood biochemistry (males, continuation).**

| Male         | Units | Group  | 0    |     | 1-mo |      | 2-mo |      | 3-mo |     | 4-mo |     | 5-mo |     | 6-mo |      |
|--------------|-------|--------|------|-----|------|------|------|------|------|-----|------|-----|------|-----|------|------|
|              |       |        | Avg  | SD  | Avg  | SD   | Avg  | SD   | Avg  | SD  | Avg  | SD  | Avg  | SD  | Avg  | SD   |
| Magnesium    | mEq/L | Saline | 2.0  | 0.3 | 1.9  | 0.2  | 2.0  | 0.2  | 1.9  | 0.1 | 2.0  | 0.2 | 1.9  | 0.1 | 2.0  | 0.2  |
|              |       | IGF-1  | 1.9  | 0.2 | 1.9  | 0.2  | 1.8  | 0.1  | 1.8  | 0.2 | 1.9  | 0.1 | 2.0  | 0.2 | 2.0  | 0.2  |
| Sodium       | mEq/L | Saline | 144  | 3   | 143  | 1    | 144  | 1    | 142  | 2   | 144  | 1   | 141  | 2   | 144  | 2    |
|              |       | IGF-1  | 143  | 2   | 141  | 4    | 143  | 1    | 143  | 3   | 144  | 2   | 141  | 3   | 144  | 1    |
| Potassium    | mEq/L | Saline | 4.0  | 0.3 | 3.9  | 0.1  | 4.4  | 0.5  | 4.2  | 0.2 | 4.1  | 0.3 | 4.2  | 0.2 | 4.6  | 0.1  |
|              |       | IGF-1  | 4.0  | 0.5 | 4.1  | 0.3  | 3.9  | 0.1  | 4.0  | 0.3 | 4.1  | 0.3 | 4.3  | 0.8 | 4.6  | 0.5  |
| NA/K RATIO   |       | Saline | 36   | 3.5 | 36   | 1.3  | 33   | 3.4  | 34   | 2.1 | 35   | 2.1 | 34   | 1.5 | 32   | 1.3  |
|              |       | IGF-1  | 36   | 3.6 | 34   | 2.2  | 36   | 1.5  | 36   | 2.4 | 35   | 2.1 | 33   | 5.3 | 32   | 2.8  |
| Chloride     | mEq/L | Saline | 99   | 4   | 99   | 2    | 99   | 1    | 100  | 1   | 103  | 2   | 101  | 2   | 102  | 1    |
|              |       | IGF-1  | 97   | 3   | 100  | 3    | 100  | 2    | 100  | 2   | 101  | 2   | 100  | 3   | 101  | 2    |
| Cholesterol  | mg/dL | Saline | 150  | 42  | 361  | 83   | 366  | 62   | 331  | 52  | 307  | 48  | 289  | 131 | 250  | 56   |
|              |       | IGF-1  | 163  | 51  | 415  | 106  | 410  | 111  | 347  | 94  | 305  | 107 | 344  | 128 | 282  | 102  |
| TRIGLYCERIDE | mg/dL | Saline | 32   | 8   | 28   | 4    | 61   | 20   | 42   | 12  | 40   | 6   | 39   | 19  | 47   | 17   |
|              |       | IGF-1  | 33   | 14  | 37   | 23   | 29   | 10   | 30   | 5   | 32   | 5   | 34   | 8   | 41   | 7    |
| Amylase      | IU/L  | Saline | 1418 | 360 | 1603 | 360  | 1559 | 350  | 1441 | 343 | 1593 | 399 | 1546 | 411 | 1523 | 372  |
|              |       | IGF-1  | 1374 | 312 | 1459 | 340  | 1429 | 350  | 1381 | 379 | 1478 | 446 | 1501 | 416 | 1399 | 376  |
| PrecisionPSL | U/L   | Saline | 7    | 1   | 7    | 1    | 8    | 2    | 6    | 1   | 6    | 2   | 6    | 1   | 7    | 1    |
|              |       | IGF-1  | 8    | 1   | 9    | 5    | 7    | 0    | 6    | 1   | 6    | 0   | 6    | 1   | 6    | 1    |
| CPK          | IU/L  | Saline | 408  | 121 | 2154 | 2160 | 3519 | 6915 | 498  | 112 | 621  | 359 | 753  | 914 | 381  | 54   |
|              |       | IGF-1  | 798  | 649 | 701  | 673  | 616  | 263  | 538  | 299 | 573  | 358 | 345  | 100 | 1715 | 3065 |

**Supplemental Table 2C. FH pigs blood biochemistry (females)**

| Female          | Units | Group  | 0    |     | 1-mo |     | 2-mo |      | 3-mo |     | 4-mo |      | 5-mo |      | 6-mo |     |
|-----------------|-------|--------|------|-----|------|-----|------|------|------|-----|------|------|------|------|------|-----|
|                 |       |        | Avg  | SD  | Avg  | SD  | Avg  | SD   | Avg  | SD  | Avg  | SD   | Avg  | SD   | Avg  | SD  |
| Total Protein   | g/dL  | Saline | 6.6  | 0.5 | 6.7  | 0.5 | 6.6  | 0.4  | 6.6  | 0.3 | 6.9  | 0.5  | 7.0  | 0.6  | 6.8  | 0.3 |
|                 |       | IGF-1  | 6.5  | 0.3 | 6.5  | 0.4 | 6.2  | 0.5  | 6.1  | 0.3 | 6.5  | 0.2  | 6.6  | 0.8  | 6.3  | 0.6 |
| Albumin         | g/dL  | Saline | 3.8  | 0.5 | 3.7  | 0.4 | 3.9  | 0.4  | 3.7  | 0.3 | 3.8  | 0.4  | 4.0  | 0.3  | 3.8  | 0.5 |
|                 |       | IGF-1  | 3.8  | 0.2 | 3.6  | 0.3 | 3.9  | 0.2  | 3.7  | 0.3 | 4.1  | 0.3  | 3.8  | 0.6  | 3.6  | 0.4 |
| Globulin        | g/dL  | Saline | 2.8  | 0.3 | 2.9  | 0.6 | 2.6  | 0.5  | 2.9  | 0.5 | 3.1  | 0.6  | 3.1  | 0.6  | 3.0  | 0.4 |
|                 |       | IGF-1  | 2.7  | 0.4 | 2.9  | 0.7 | 2.4  | 0.6  | 2.4  | 0.5 | 2.4  | 0.3  | 2.8  | 1.4  | 2.7  | 0.9 |
| A/G Ratio       |       | Saline | 1.4  | 0.3 | 1.3  | 0.3 | 1.5  | 0.3  | 1.3  | 0.2 | 1.3  | 0.3  | 1.3  | 0.3  | 1.3  | 0.4 |
|                 |       | IGF-1  | 1.5  | 0.4 | 1.3  | 0.4 | 1.7  | 0.5  | 1.6  | 0.5 | 1.7  | 0.3  | 1.6  | 0.7  | 1.5  | 0.5 |
| AST (SGOT)      | IU/L  | Saline | 18   | 4.3 | 20   | 2.4 | 20   | 1.5  | 20   | 2.1 | 20   | 3.8  | 28   | 12.3 | 20   | 7.0 |
|                 |       | IGF-1  | 20   | 2.9 | 20   | 3.4 | 25   | 11.7 | 20   | 2.7 | 38   | 30.1 | 20   | 2.6  | 19   | 2.3 |
| ALT (SGPT)      | IU/L  | Saline | 25   | 3.0 | 27   | 3.4 | 27   | 3.4  | 23   | 3.3 | 21   | 1.3  | 21   | 2.3  | 21   | 3.2 |
|                 |       | IGF-1  | 23   | 3.4 | 25   | 1.8 | 25   | 1.9  | 22   | 2.3 | 24   | 4.4  | 21   | 2.9  | 21   | 2.7 |
| Alk Phosphatase | IU/L  | Saline | 65   | 15  | 75   | 23  | 69   | 19   | 64   | 21  | 60   | 23   | 67   | 18   | 61   | 15  |
|                 |       | IGF-1  | 68   | 19  | 79   | 18  | 73   | 13   | 74   | 19  | 69   | 16   | 64   | 16   | 59   | 13  |
| GGT             | IU/L  | Saline | 25   | 6   | 26   | 9   | 24   | 9    | 37   | 13  | 25   | 9    | 28   | 8    | 28   | 7   |
|                 |       | IGF-1  | 26   | 12  | 24   | 8   | 21   | 10   | 34   | 24  | 27   | 12   | 23   | 9    | 23   | 10  |
| Total Bilirubin | mg/dL | Saline | 0.1  | 0.1 | 0.1  | 0.0 | 0.1  | 0.0  | 0.1  | 0.1 | 0.1  | 0.0  | 0.1  | 0.0  | 0.1  | 0.0 |
|                 |       | IGF-1  | 0.2  | 0.1 | 0.1  | 0.1 | 0.1  | 0.0  | 0.1  | 0.1 | 0.1  | 0.0  | 0.1  | 0.0  | 0.1  | 0.0 |
| BUN             | mg/dL | Saline | 11   | 4.8 | 11   | 1.5 | 12   | 1.8  | 12   | 3.1 | 9    | 1.9  | 10   | 1.7  | 12   | 2.3 |
|                 |       | IGF-1  | 10   | 1.9 | 8    | 1.5 | 7    | 0.7  | 7    | 1.1 | 8    | 1.8  | 7    | 1.5  | 8    | 1.5 |
| Creatinine      | mg/dL | Saline | 1.5  | 0.2 | 1.6  | 0.1 | 1.5  | 0.2  | 1.7  | 0.2 | 1.8  | 0.2  | 1.8  | 0.2  | 1.8  | 0.3 |
|                 |       | IGF-1  | 1.5  | 0.2 | 1.3  | 0.2 | 1.4  | 0.2  | 1.5  | 0.2 | 1.6  | 0.2  | 1.5  | 0.2  | 1.5  | 0.2 |
| BUN/CREAT RATIO |       | Saline | 8    | 3.9 | 7    | 1.0 | 8    | 1.9  | 7    | 1.9 | 5    | 1.7  | 6    | 1.3  | 7    | 2.1 |
|                 |       | IGF-1  | 7    | 2.1 | 6    | 1.1 | 5    | 0.8  | 5    | 0.4 | 5    | 1.3  | 5    | 0.5  | 5    | 0.8 |
| Phosphorus      | mg/dL | Saline | 5.8  | 0.3 | 5.7  | 0.2 | 5.8  | 0.2  | 5.8  | 0.8 | 5.6  | 0.4  | 5.6  | 0.4  | 5.8  | 0.7 |
|                 |       | IGF-1  | 5.8  | 0.1 | 6.4  | 0.5 | 5.7  | 0.3  | 5.7  | 0.6 | 5.9  | 0.5  | 5.5  | 0.6  | 5.4  | 0.5 |
| Glucose         | mg/dL | Saline | 141  | 9   | 112  | 24  | 101  | 14   | 146  | 54  | 112  | 33   | 91   | 10   | 113  | 13  |
|                 |       | IGF-1  | 128  | 23  | 93   | 11  | 100  | 21   | 104  | 29  | 100  | 12   | 84   | 13   | 86   | 11  |
| CALCIUM         | mg/dL | Saline | 10.8 | 0.5 | 9.9  | 0.3 | 10.4 | 0.4  | 10.4 | 0.2 | 10.4 | 0.3  | 10.5 | 0.2  | 10.4 | 0.3 |
|                 |       | IGF-1  | 10.7 | 0.2 | 9.9  | 0.4 | 10.2 | 0.2  | 10.3 | 0.1 | 10.3 | 0.2  | 10.1 | 0.3  | 9.8  | 0.4 |

**Supplemental Table 2D. FH pigs blood biochemistry (females, continuation).**

| Female        | Units | Group  | 0    |     | 1-mo |     | 2-mo |      | 3-mo |     | 4-mo |      | 5-mo |     | 6-mo |     |
|---------------|-------|--------|------|-----|------|-----|------|------|------|-----|------|------|------|-----|------|-----|
|               |       |        | Avg  | SD  | Avg  | SD  | Avg  | SD   | Avg  | SD  | Avg  | SD   | Avg  | SD  | Avg  | SD  |
| Magnesium     | mEq/L | Saline | 2.0  | 0.2 | 2.0  | 0.3 | 2.1  | 0.3  | 1.9  | 0.3 | 1.9  | 0.2  | 1.9  | 0.2 | 2.0  | 0.1 |
|               |       | IGF-1  | 1.8  | 0.1 | 1.8  | 0.2 | 1.8  | 0.1  | 1.7  | 0.1 | 1.8  | 0.2  | 1.6  | 0.1 | 1.6  | 0.1 |
| Sodium        | mEq/L | Saline | 141  | 3   | 140  | 2   | 138  | 3    | 135  | 4   | 139  | 3    | 138  | 2   | 139  | 4   |
|               |       | IGF-1  | 140  | 1   | 140  | 2   | 139  | 0    | 140  | 2   | 141  | 2    | 140  | 1   | 139  | 2   |
| Potassium     | mEq/L | Saline | 4.0  | 0.1 | 4.0  | 0.2 | 4.1  | 0.6  | 4.2  | 0.4 | 4.3  | 0.6  | 3.9  | 0.2 | 4.2  | 0.5 |
|               |       | IGF-1  | 3.9  | 0.1 | 4.3  | 0.3 | 4.0  | 0.3  | 4.0  | 0.1 | 4.7  | 0.9  | 4.2  | 0.3 | 4.1  | 0.2 |
| NA/K RATIO    |       | Saline | 35   | 1.2 | 35   | 2.5 | 34   | 4.1  | 32   | 2.9 | 33   | 4.1  | 36   | 1.5 | 34   | 3.8 |
|               |       | IGF-1  | 36   | 1.3 | 33   | 2.5 | 35   | 2.5  | 35   | 0.8 | 31   | 5.4  | 34   | 2.2 | 34   | 1.9 |
| Chloride      | mEq/L | Saline | 99   | 3   | 100  | 2   | 97   | 3    | 94   | 3   | 99   | 3    | 98   | 3   | 98   | 3   |
|               |       | IGF-1  | 99   | 2   | 99   | 2   | 100  | 1    | 101  | 1   | 101  | 2    | 101  | 1   | 102  | 1   |
| Cholesterol   | mg/dL | Saline | 441  | 153 | 932  | 337 | 917  | 359  | 922  | 428 | 812  | 329  | 860  | 367 | 809  | 293 |
|               |       | IGF-1  | 427  | 95  | 696  | 96  | 764  | 196  | 764  | 173 | 723  | 181  | 655  | 220 | 615  | 139 |
| TRIGLYCERIDE  | mg/dL | Saline | 83   | 26  | 54   | 13  | 61   | 10   | 61   | 10  | 57   | 17   | 63   | 25  | 91   | 31  |
|               |       | IGF-1  | 55   | 22  | 48   | 35  | 45   | 11   | 40   | 14  | 49   | 19   | 48   | 35  | 38   | 8   |
| Amylase       | IU/L  | Saline | 1199 | 267 | 1188 | 479 | 1192 | 464  | 1154 | 420 | 1128 | 387  | 1284 | 546 | 1271 | 475 |
|               |       | IGF-1  | 1283 | 502 | 1313 | 467 | 1355 | 514  | 1287 | 504 | 1283 | 448  | 1340 | 537 | 1378 | 561 |
| Precision PSL | U/L   | Saline | 10   | 5   | 8    | 1   | 8    | 2    | 8    | 1   | 8    | 1    | 8    | 2   | 9    | 1   |
|               |       | IGF-1  | 8    | 0   | 8    | 2   | 7    | 0    | 7    | 0   | 9    | 3    | 7    | 1   | 9    | 1   |
| CPK           | IU/L  | Saline | 260  | 74  | 286  | 33  | 343  | 95   | 338  | 90  | 408  | 345  | 919  | 985 | 282  | 61  |
|               |       | IGF-1  | 509  | 412 | 347  | 155 | 874  | 1245 | 330  | 74  | 1405 | 2095 | 603  | 818 | 271  | 91  |

**Supplemental Table 3A. FH pigs CBC with differential (males)**

| Male                 |                     | Group  | 0    |      | 1-mo |      | 2-mo |     | 3-mo |      | 4-mo |      | 5-mo |      | 6-mo |      |
|----------------------|---------------------|--------|------|------|------|------|------|-----|------|------|------|------|------|------|------|------|
|                      |                     |        | Avg  | SD   | Avg  | SD   | Avg  | SD  | Avg  | SD   | Avg  | SD   | Avg  | SD   | Avg  | SD   |
| Complete Blood Count | Units               |        |      |      |      |      |      |     |      |      |      |      |      |      |      |      |
| WBC                  | 10 <sup>3</sup> /uL | Saline | 9.2  | 2.4  | 6.7  | 1.0  | 7.4  | 0.7 | 7.4  | 1.3  | 8.0  | 2.0  | 7.9  | 1.4  | 8.6  | 1.6  |
|                      |                     | IGF-1  | 9.1  | 2.8  | 8.0  | 1.2  | 7.4  | 0.7 | 8.9  | 1.1  | 7.9  | 1.0  | 7.7  | 1.5  | 8.6  | 0.9  |
| RBC                  | 10 <sup>6</sup> /uL | Saline | 6.0  | 1.6  | 6.1  | 0.7  | 5.6  | 0.5 | 4.8  | 0.5  | 5.1  | 0.5  | 4.9  | 0.4  | 4.7  | 0.5  |
|                      |                     | IGF-1  | 5.3  | 0.8  | 6.1  | 0.9  | 5.0  | 0.7 | 4.4  | 0.5  | 4.9  | 0.5  | 4.6  | 0.4  | 4.2  | 0.6  |
| HGB                  | g/dL                | Saline | 11.4 | 2.7  | 12.0 | 1.3  | 11.2 | 0.9 | 10.0 | 1.1  | 10.5 | 1.1  | 10.4 | 0.8  | 9.8  | 1.0  |
|                      |                     | IGF-1  | 10.2 | 1.5  | 11.9 | 1.5  | 10.1 | 1.0 | 8.9  | 0.7  | 10.0 | 0.7  | 9.9  | 0.9  | 8.9  | 1.3  |
| HCT                  | %                   | Saline | 38   | 9    | 38   | 4    | 37   | 3   | 30   | 3    | 34   | 3    | 33   | 2    | 31   | 3    |
|                      |                     | IGF-1  | 33   | 5    | 38   | 5    | 31   | 4   | 27   | 3    | 33   | 3    | 31   | 3    | 29   | 4    |
| MCV                  | fL                  | Saline | 64   | 3    | 63   | 1    | 66   | 2   | 63   | 6    | 66   | 2    | 67   | 1    | 65   | 3    |
|                      |                     | IGF-1  | 63   | 4    | 62   | 2    | 63   | 2   | 62   | 6    | 67   | 1    | 67   | 2    | 68   | 2    |
| MCH                  | pg                  | Saline | 19.2 | 0.8  | 19.7 | 0.7  | 20.0 | 0.8 | 20.8 | 0.7  | 20.5 | 0.7  | 21.2 | 0.6  | 20.8 | 0.9  |
|                      |                     | IGF-1  | 19.1 | 0.8  | 19.7 | 0.9  | 20.7 | 1.1 | 20.2 | 1.6  | 20.5 | 0.7  | 21.5 | 1.0  | 21.3 | 0.9  |
| MCHC                 | g/dL                | Saline | 30   | 0.9  | 31   | 0.4  | 30   | 0.5 | 33   | 2.4  | 31   | 0.4  | 32   | 1.1  | 32   | 2.1  |
|                      |                     | IGF-1  | 30   | 0.7  | 32   | 0.5  | 33   | 1.4 | 33   | 4.1  | 30   | 0.5  | 32   | 0.8  | 31   | 0.8  |
| Platelet Count       | 10 <sup>3</sup> /uL | Saline | 382  | 66   | 326  | 48   | 371  | 31  | 340  | 65   | 301  | 23   | 349  | 55   | 386  | 74   |
|                      |                     | IGF-1  | 346  | 65   | 253  | 41   | 274  | 104 | 258  | 86   | 324  | 74   | 289  | 43   | 305  | 79   |
| Neutrophils          | /uL                 | Saline | 3790 | 2260 | 2105 | 780  | 2608 | 751 | 2750 | 1045 | 3346 | 1457 | 3239 | 1126 | 3183 | 1680 |
|                      |                     | IGF-1  | 4448 | 2162 | 3163 | 1291 | 2616 | 535 | 3594 | 308  | 3700 | 1259 | 3393 | 1165 | 3245 | 661  |
| Lymphocytes          | /uL                 | Saline | 5017 | 757  | 4306 | 350  | 4518 | 559 | 4189 | 536  | 4239 | 875  | 4267 | 644  | 5140 | 1062 |
|                      |                     | IGF-1  | 4261 | 1521 | 4366 | 787  | 4516 | 774 | 4767 | 834  | 3618 | 640  | 3967 | 503  | 4700 | 127  |
| Monocytes            | /uL                 | Saline | 352  | 109  | 254  | 62   | 284  | 50  | 321  | 114  | 415  | 265  | 295  | 61   | 170  | 151  |
|                      |                     | IGF-1  | 321  | 82   | 355  | 252  | 244  | 110 | 383  | 176  | 541  | 228  | 307  | 59   | 293  | 120  |
| Eosinophils          | /uL                 | Saline | 50   | 47   | 55   | 32   | 30   | 41  | 120  | 51   | 39   | 54   | 99   | 66   | 106  | 56   |
|                      |                     | IGF-1  | 110  | 53   | 77   | 59   | 64   | 71  | 156  | 64   | 80   | 96   | 0    | 0    | 322  | 346  |
| Basophils            | /uL                 | Saline | 0    | 0    | 0    | 0    | 0    | 0   | 0    | 0    | 0    | 0    | 0    | 0    | 0    | 0    |
|                      |                     | IGF-1  | 0    | 0    | 0    | 0    | 0    | 0   | 0    | 0    | 0    | 0    | 12   | 28   | 0    | 0    |

**Supplemental Table 3B. FH pigs CBC with differential (females)**

| Female         | Units               | Group  | 0    |      | 1-mo |      | 2-mo |      | 3-mo |      | 4-mo |      | 5-mo |      | 6-mo |      |
|----------------|---------------------|--------|------|------|------|------|------|------|------|------|------|------|------|------|------|------|
|                |                     |        | Avg  | SD   | Avg  | SD   | Avg  | SD   | Avg  | SD   | Avg  | SD   | Avg  | SD   | Avg  | SD   |
| WBC            | 10 <sup>3</sup> /uL | Saline | 7.1  | 3.3  | 6.2  | 1.8  | 6.9  | 2.5  | 6.4  | 2.0  | 7.1  | 3.4  | 7.6  | 2.9  | 6.7  | 3.0  |
|                |                     | IGF-1  | 5.9  | 0.6  | 6.8  | 0.9  | 6.4  | 1.2  | 6.3  | 1.3  | 7.2  | 0.8  | 7.7  | 1.9  | 6.9  | 1.9  |
| RBC            | 10 <sup>6</sup> /uL | Saline | 4.4  | 0.4  | 5.0  | 0.7  | 4.8  | 0.6  | 4.6  | 0.4  | 4.7  | 0.7  | 5.3  | 0.9  | 4.6  | 0.6  |
|                |                     | IGF-1  | 4.8  | 0.3  | 4.8  | 0.4  | 5.1  | 0.7  | 4.6  | 0.3  | 4.9  | 0.5  | 4.6  | 0.7  | 4.3  | 0.2  |
| HGB            | g/dL                | Saline | 8.4  | 0.4  | 9.3  | 1.0  | 9.2  | 0.8  | 8.9  | 0.8  | 9.2  | 1.3  | 10.3 | 1.3  | 8.9  | 0.9  |
|                |                     | IGF-1  | 9.1  | 0.6  | 9.3  | 0.9  | 10.0 | 1.4  | 9.2  | 0.6  | 9.9  | 1.2  | 9.3  | 1.3  | 8.7  | 0.4  |
| HCT            | %                   | Saline | 26   | 2    | 29   | 3    | 28   | 3    | 26   | 2    | 28   | 4    | 31   | 4    | 27   | 3    |
|                |                     | IGF-1  | 28   | 3    | 29   | 3    | 30   | 4    | 27   | 2    | 30   | 3    | 28   | 4    | 26   | 2    |
| MCV            | fL                  | Saline | 59   | 4    | 58   | 2    | 58   | 3    | 57   | 3    | 59   | 3    | 59   | 3    | 60   | 4    |
|                |                     | IGF-1  | 59   | 4    | 60   | 3    | 59   | 1    | 59   | 1    | 61   | 1    | 61   | 3    | 62   | 1    |
| MCH            | pg                  | Saline | 19.0 | 1.0  | 18.7 | 1.3  | 19.5 | 1.3  | 21.5 | 5.1  | 19.4 | 1.1  | 19.4 | 1.0  | 19.7 | 1.5  |
|                |                     | IGF-1  | 18.9 | 0.5  | 19.5 | 0.7  | 19.6 | 0.8  | 20.1 | 0.5  | 20.4 | 0.5  | 20.2 | 0.5  | 20.1 | 0.4  |
| MCHC           | g/dL                | Saline | 33   | 2.6  | 32   | 1.6  | 34   | 0.8  | 34   | 0.8  | 33   | 0.4  | 33   | 0.4  | 33   | 0.8  |
|                |                     | IGF-1  | 32   | 2.1  | 33   | 0.8  | 33   | 1.4  | 34   | 0.5  | 33   | 0.4  | 34   | 1.0  | 33   | 0.9  |
| Platelet Count | 10 <sup>3</sup> /uL | Saline | 325  | 37   | 347  | 62   | 320  | 87   | 368  | 83   | 375  | 143  | 327  | 68   | 318  | 60   |
|                |                     | IGF-1  | 290  | 110  | 345  | 112  | 280  | 99   | 286  | 95   | 257  | 139  | 243  | 172  | 282  | 122  |
| Neutrophils    | /uL                 | Saline | 2904 | 2995 | 2366 | 1977 | 2477 | 2385 | 2454 | 2213 | 2802 | 2908 | 2906 | 2846 | 2509 | 2457 |
|                |                     | IGF-1  | 1744 | 513  | 2489 | 1232 | 1535 | 1034 | 1455 | 900  | 1879 | 387  | 2466 | 1618 | 2234 | 1589 |
| Lymphocytes    | /uL                 | Saline | 3985 | 1674 | 3666 | 1076 | 4174 | 645  | 3597 | 774  | 3930 | 809  | 4148 | 846  | 3740 | 520  |
|                |                     | IGF-1  | 3683 | 778  | 3845 | 715  | 4455 | 1097 | 4506 | 754  | 4869 | 989  | 4737 | 1014 | 4407 | 467  |
| Monocytes      | /uL                 | Saline | 147  | 40   | 167  | 89   | 185  | 129  | 272  | 80   | 270  | 93   | 367  | 99   | 292  | 123  |
|                |                     | IGF-1  | 319  | 205  | 384  | 167  | 416  | 162  | 247  | 154  | 234  | 81   | 361  | 218  | 182  | 68   |
| Eosinophils    | /uL                 | Saline | 84   | 80   | 0    | 0    | 24   | 54   | 56   | 61   | 79   | 52   | 139  | 109  | 91   | 42   |
|                |                     | IGF-1  | 109  | 84   | 41   | 93   | 14   | 31   | 77   | 39   | 178  | 164  | 136  | 144  | 76   | 67   |
| Basophils      | /uL                 | Saline | 0    | 0    | 0    | 0    | 0    | 0    | 0    | 0    | 0    | 0    | 0    | 0    | 47   | 106  |
|                |                     | IGF-1  | 25   | 35   | 0    | 0    | 0    | 0    | 14   | 32   | 0    | 0    | 0    | 0    | 0    | 0    |

**Supplementary Table 4. Quality controls for spatial transcriptomic (ST) analysis**

| <b>Injection protocol</b>                         | <b>IGF-1</b> | <b>IGF-1</b> | <b>Saline</b> | <b>Saline</b> |                 |
|---------------------------------------------------|--------------|--------------|---------------|---------------|-----------------|
| <b>Quality controls/pigs ID</b>                   | <b>#651</b>  | <b>#493</b>  | <b>#654</b>   | <b>#495</b>   | <b>Mean±SEM</b> |
| Number of reads, millions                         | 138.9        | 150.9        | 87.3          | 106.6         | 121.0±14.6      |
| Median genes per Spot                             | 1822.5       | 2181.0       | 2037.0        | 2449.0        | 2122.4±131.4    |
| Median UMI counts per spot                        | 5488.0       | 6914.0       | 5377.0        | 8131.0        | 6477.5±652.9    |
| Valid barcodes, %                                 | 98.1         | 98.1         | 97.9          | 98.1          | 98.0±0.1        |
| Valid UMIs, %                                     | 100.0        | 100.0        | 99.8          | 100.0         | 99.9±0.01       |
| Q30 bases in barcode, %                           | 96.0         | 96.2         | 96.0          | 95.9          | 96.0±0.1        |
| Q30 bases in RNA read, %                          | 95.7         | 95.7         | 95.5          | 95.7          | 95.6±0.01       |
| Q30 bases in UMI, %                               | 96.5         | 96.6         | 96.4          | 96.4          | 96.5±0.1        |
| Reads mapped to genome, %                         | 94.1         | 95.2         | 91.8          | 95.7          | 94.2±0.9        |
| Reads mapped confidently to genome, %             | 90.8         | 93.1         | 89.2          | 93.6          | 91.7±1.0        |
| Reads mapped confidently to intergenic regions, % | 2.8          | 2.9          | 3.5           | 2.8           | 3.0±0.2         |
| Reads mapped confidently to intronic regions, %   | 5.7          | 5.0          | 7.1           | 5.2           | 5.7±0.5         |
| Reads mapped confidently to exonic regions, %     | 82.3         | 85.2         | 78.6          | 85.7          | 83.0±1.6        |
| Reads mapped confidently to transcriptome, %      | 76.5         | 79.8         | 72.6          | 79.9          | 77.2±1.7        |
| Reads mapped antisense to gene, %                 | 1.0          | 1.1          | 1.4           | 1.1           | 1.2±0.1         |
| Fraction reads in spots under tissue, %           | 85.7         | 80.2         | 83.4          | 81.6          | 82.7±1.2        |
| Total genes detected                              | 17937.0      | 16888.0      | 17129.0       | 16630.0       | 17146±282       |

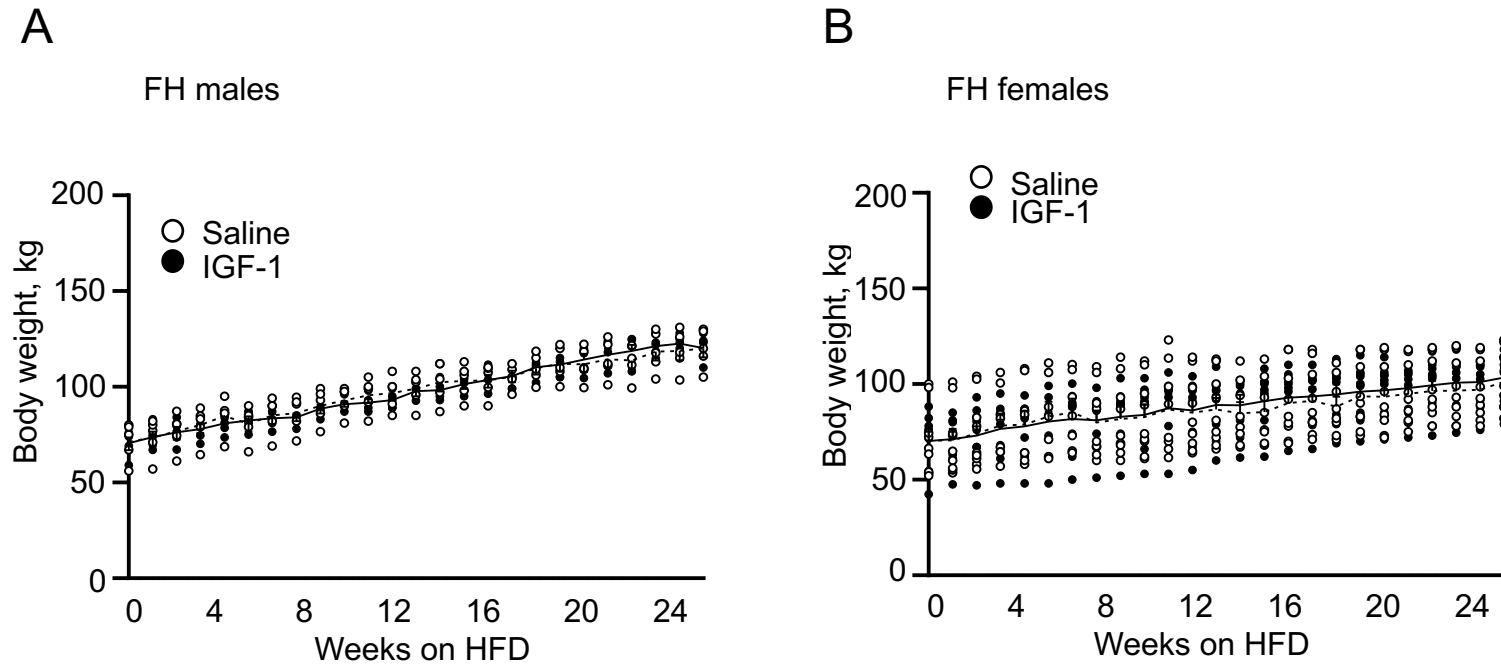

**Supplemental Figure 1. FH pigs body weight.** IGF-1 or saline (control) was injected into FH pigs (A, males, 5/group, B, females, 9/group) and pigs were fed with high-fat diet (HFD) for 6 months. Body weight was measured weekly. Individual data-points are shown (saline, empty circle, IGF-1 solid circle).

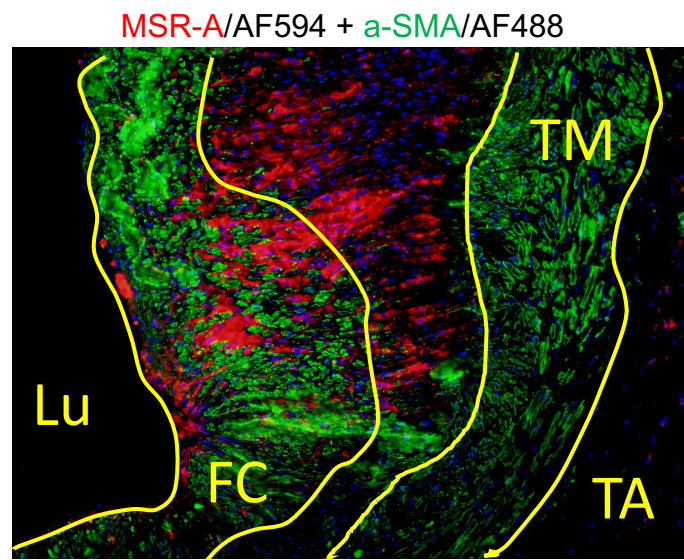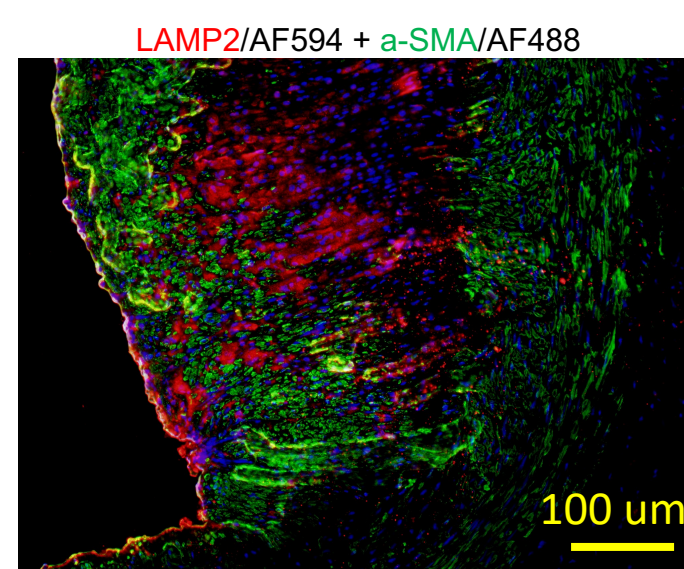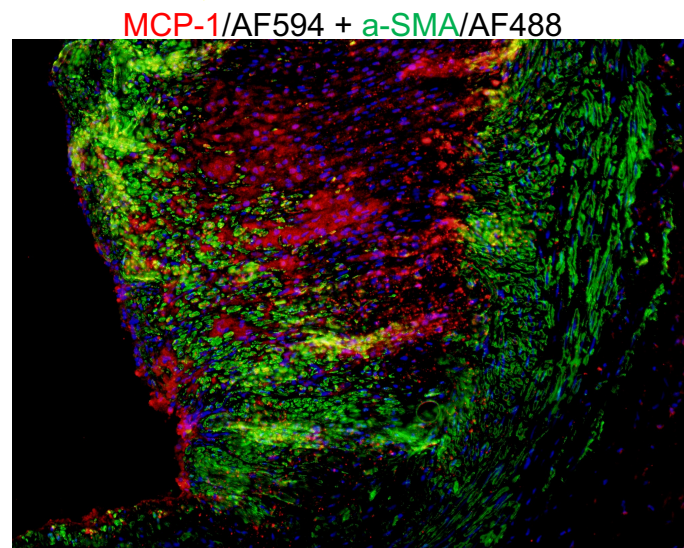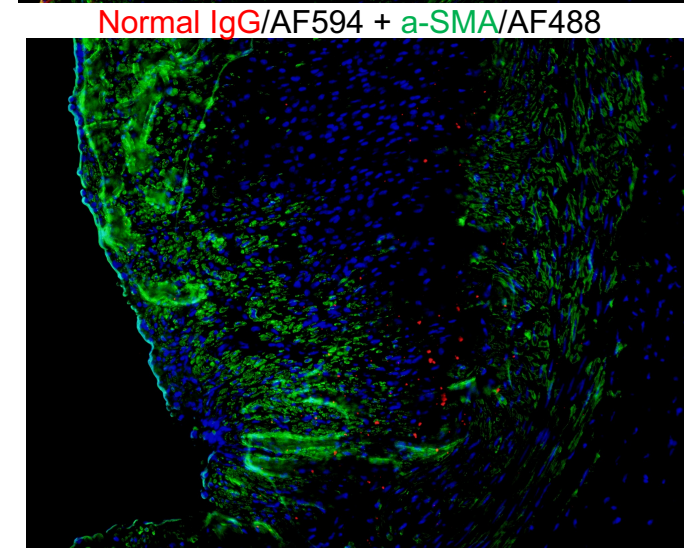

**Supplemental Figure 2A. Validation of cell marker antibodies for immunohistochemistry.** RCA serial cross-sections were obtained from saline-injected FH females. Sections were immunostained with antibody for macrophage scavenger receptor A (MSR-A), monocyte chemoattractant protein 1 (MCP-1), lysosome-associated membrane protein 2 (LAMP2) (all are macrophage markers) and co-stained with  $\alpha$ -smooth muscle actin ( $\alpha$ -SMA) antibody (SMC marker) conjugated to Alexa Fluor 488 (signal shown in green) and DAPI. Macrophage marker antibody were visualized with biotin/streptavidin amplification system using AlexaFluor 594 as a fluorescent reporter (shown in red). Note that each MF marker antibody stained virtually identical cell population in the plaque and cells immunopositive for MSR-A are immunonegative for  $\alpha$ -SMA, and *vice versa* (upper left panel). Lu, lumen, TM, tunica media, TA, tunica adventitia, FC. Fibrous cap.



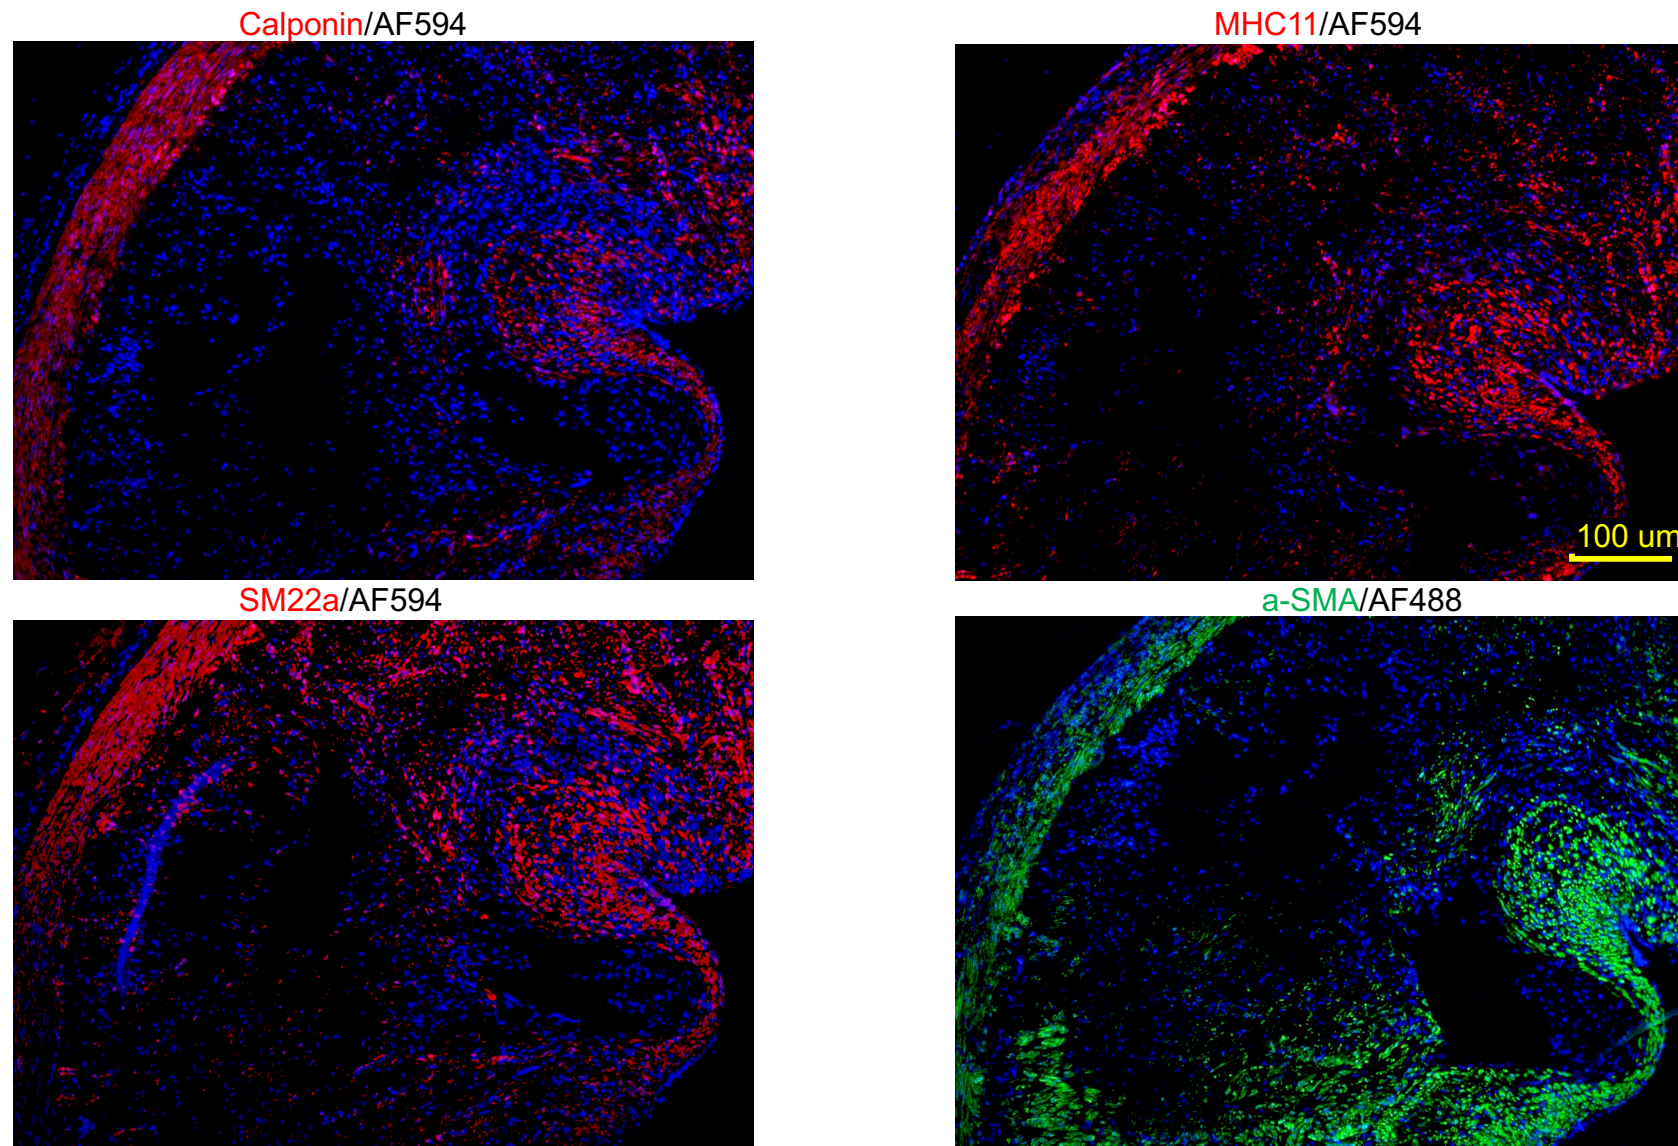

**Supplemental Figure 2B. Validation of cell marker antibodies for immunohistochemistry.** Serial RCA sections were stained with  $\alpha$ -SMA, calponin, smooth muscle protein 22 $\alpha$  (SM22 $\alpha$ ), and myosin heavy chain 11 antibody (all are SMC markers). Each of SMC antibody detected identical cell population in the plaque and vascular media.

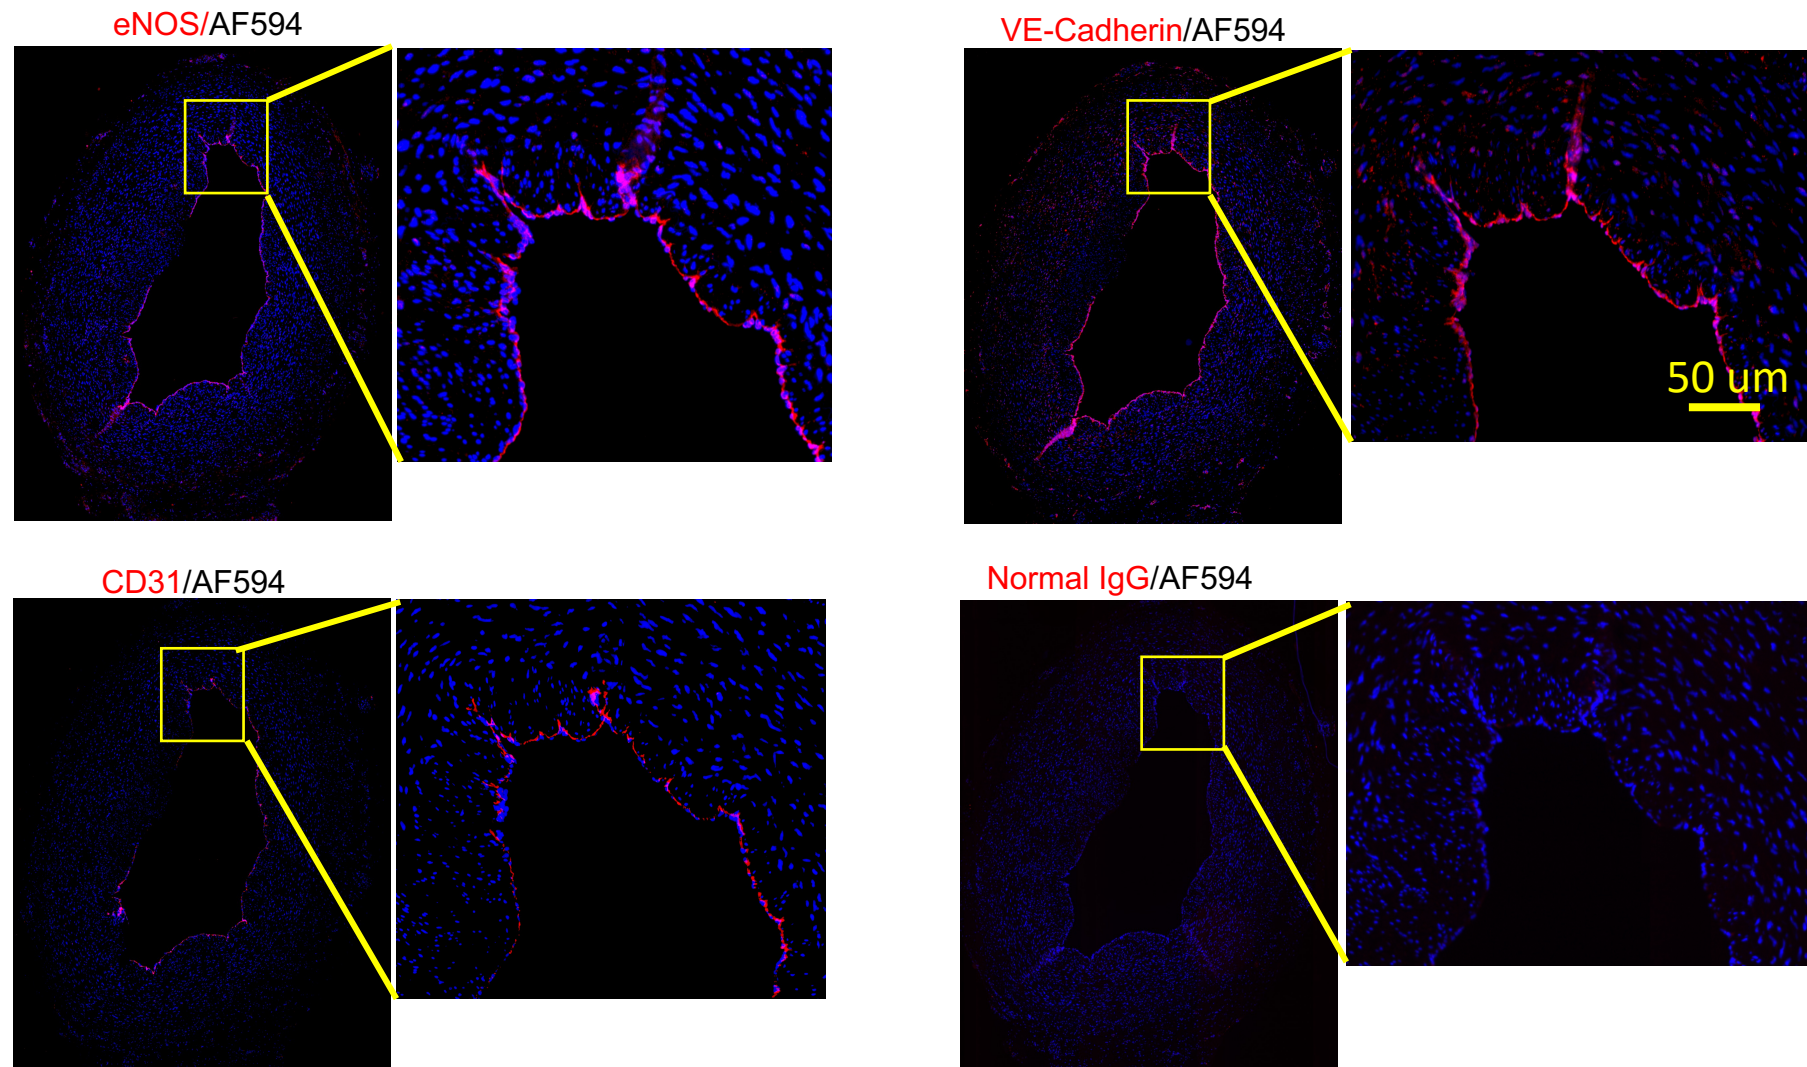

**Supplemental Figure 2C. Validation of cell marker antibodies for immunohistochemistry.** Serial RCA sections were stained with endothelial nitric oxide synthase (eNOS), CD31, VE-cadherin antibody (all are EC markers). Each of EC antibody detected identical cell subpopulation on the luminal border.

A

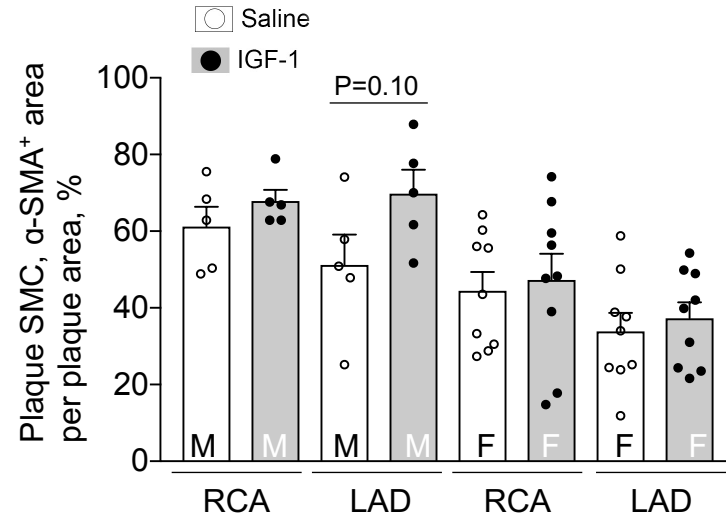

B

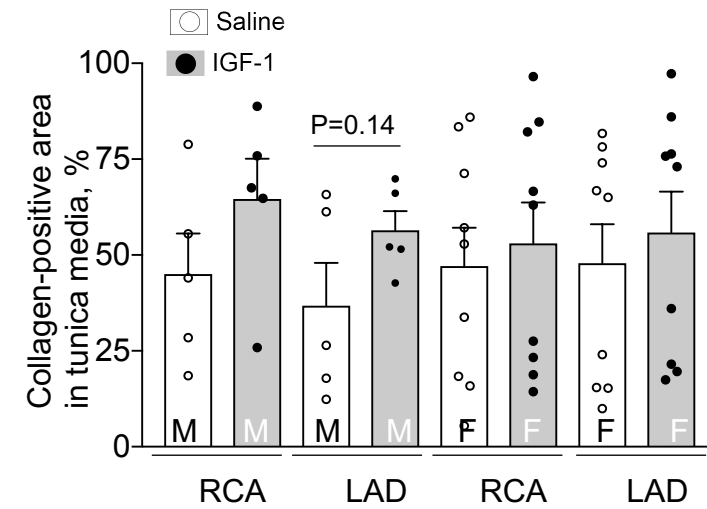

C

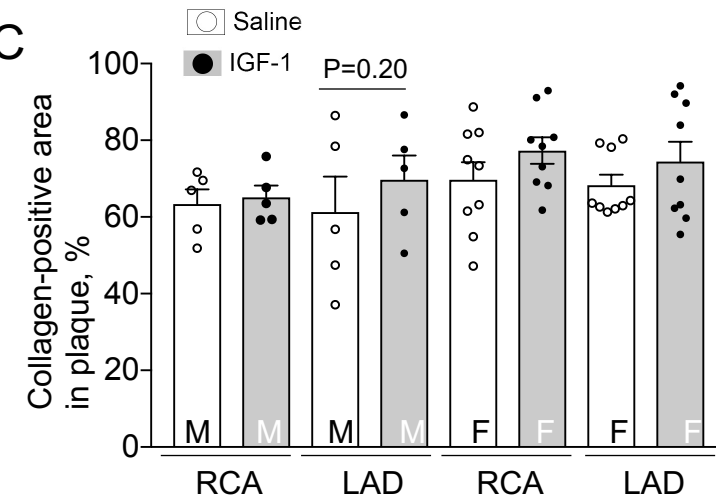

**Supplemental Figure 3. IGF-1 effect on plaque SMC and collagen.** IGF-1 or saline (control) was injected into FH pigs (N=5, males, N=9, females) and pigs were fed with high-fat diet (HFD). RCA and LAD cross-sections were immunostained with  $\alpha$ -smooth muscle actin ( $\alpha$ -SMA) antibody (SMC marker) (A) or stained with Gomori's Trichrome stain to visualize collagen in the vascular media and plaque (B, C). Sections were imaged and tunica media and atherosclerotic plaque cross-sectional area were manually outlined. M, males, F, females. P value was calculated based on Student's t-test.

A

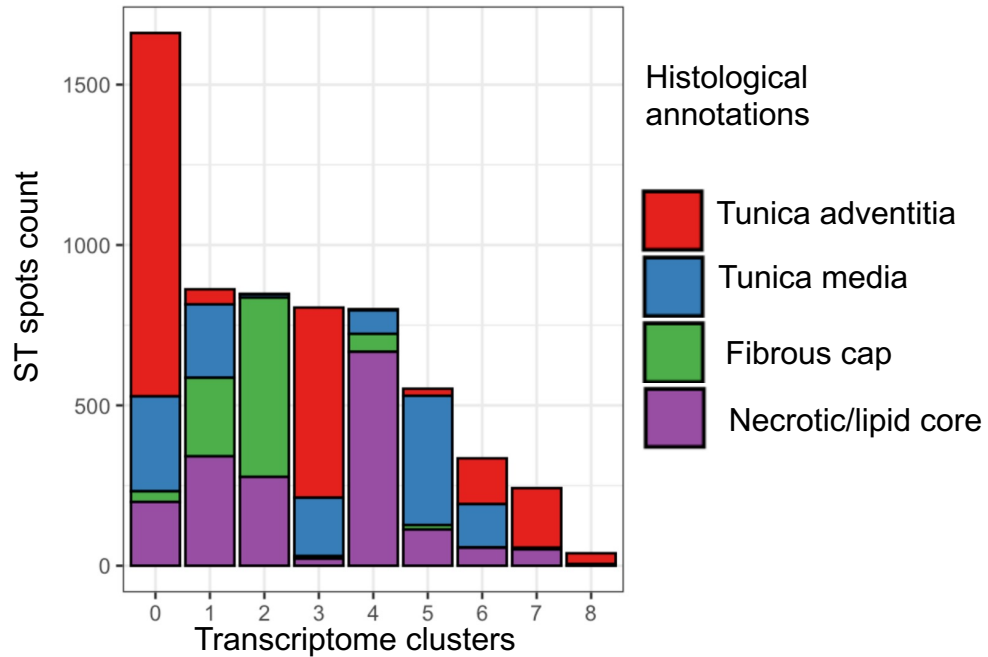

B

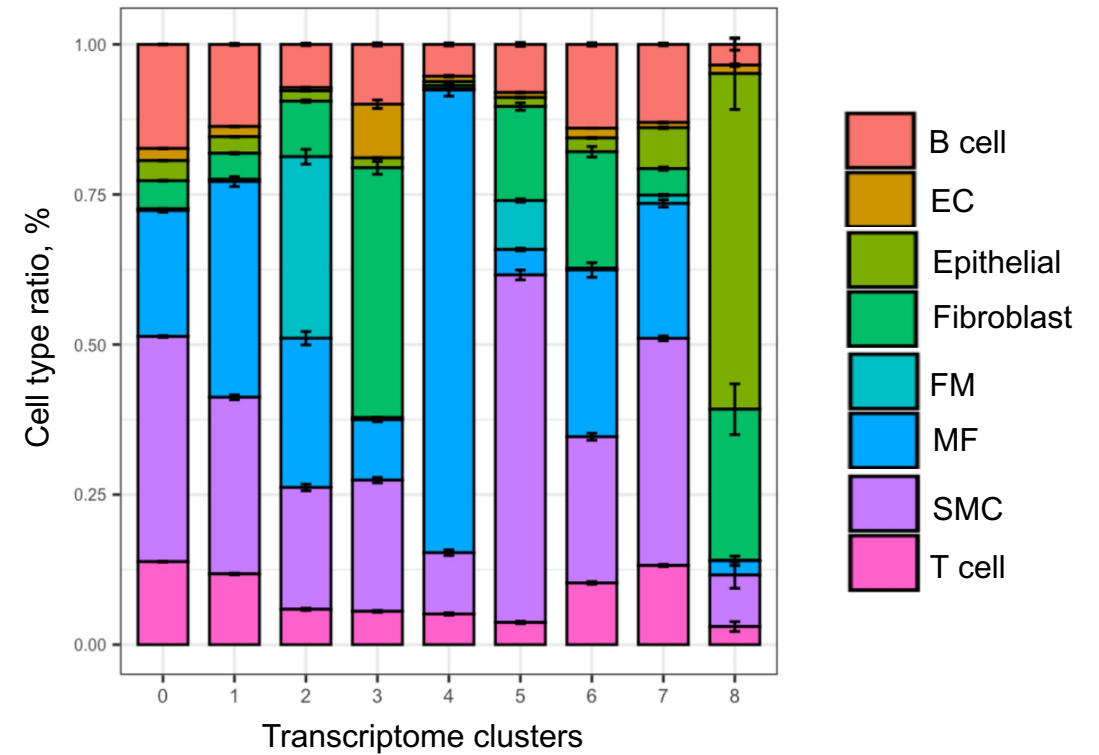

**Supplemental Figure 4. Spatial transcriptomics (ST) clustering.** RCA cryosections from IGF-1- and saline-injected FH females (N=2/group) were processed with ST protocol. A, All ST spots in IGF-1 and saline specimens were grouped into 9 clusters (0-8) based on their transcriptome. In parallel, plaque's fibrous cap, necrotic/lipid core, tunica media and tunica adventitia were manually outlined using H&E image and transcriptome clusters and histological annotations were compared side-by-side. ST spots count per each transcriptome cluster is shown. B, cell type ratio (%) was calculated for each ST spot to identify spots enriched by SMC, MF, fibromyocytes (FM), B cells, T cells, epithelial cells, endothelial cells (EC) and fibroblasts.
